# Supplementary material
Source: publisher site journal article supplement (https://www.dovepress.com/article/250251)
Supplement: Supplementary file 1 [file get_supplementary_file.php]

# Supplementary data for the manuscript: Prevalence of congenital hemolytic disorders in Denmark, 2000-2016

---

*Authors:*

**Dennis Lund Hansen<sup>1,2</sup>**

**Andreas Glenthøj<sup>3</sup>**

**Sören Möller<sup>2,4</sup>**

**Bart J. Biemond<sup>5</sup>**

**Kjeld Andersen<sup>2,6</sup>**

**David Gaist<sup>2,7</sup>**

**Jesper Petersen<sup>3</sup> and**

**Henrik Frederiksen<sup>1,2</sup>**

*Affiliation:*

<sup>1</sup>Department of Hematology, Odense University Hospital, Odense, Denmark;

<sup>2</sup>Department of Clinical Research, University of Southern Denmark, Odense, Denmark;

<sup>3</sup>Department of Hematology, Center for Hemoglobinopathies, Herlev and Gentofte Hospital, Denmark

<sup>4</sup>OPEN, Odense University Hospital, Odense, Denmark;

<sup>5</sup>Department of Hematology, Amsterdam University Medical Centre's, Amsterdam, Netherlands

<sup>6</sup>Department of Mental Health - Odense, Region of Southern Denmark, Odense, Denmark; and

<sup>7</sup>Neurology Research Unit, Department of Neurology, Odense University Hospital, Odense, Denmark

**Supplementary table 1 – Grouping of ICD-8 and ICD-10 diagnoses from the  
Danish National Patient Register and laboratory test results from the Hemolysis  
Laboratory Database**

| Group                    | Disease                     | DNRP definition |                                                                              | Laboratory definition (*)                                                                                                                                                                                                                                                                                                                                                                                                                                                                                                                                                                                                      |
|--------------------------|-----------------------------|-----------------|------------------------------------------------------------------------------|--------------------------------------------------------------------------------------------------------------------------------------------------------------------------------------------------------------------------------------------------------------------------------------------------------------------------------------------------------------------------------------------------------------------------------------------------------------------------------------------------------------------------------------------------------------------------------------------------------------------------------|
|                          |                             | ICD 8           | ICD 10                                                                       |                                                                                                                                                                                                                                                                                                                                                                                                                                                                                                                                                                                                                                |
| <b>Alpha Thalassemia</b> |                             |                 |                                                                              |                                                                                                                                                                                                                                                                                                                                                                                                                                                                                                                                                                                                                                |
|                          | Alpha Thalassemia trait     | n/a             | n/a                                                                          | Compound Heterozygote $\alpha$ -Thalassemia ( $\alpha 4,2$ , $\alpha 3,7$ )<br>Heterozygote $\alpha$ -Thalassemia ( $\alpha 3,7$ , $\alpha$ )<br>Homozygote $\alpha$ -Thalassemia ( $\alpha 3,7$ , $\alpha 3,7$ )<br>Heterozygote $\alpha$ -Thalassemia ( $\alpha$ SEA, $\alpha$ )<br>Heterozygote $\alpha$ -Thalassemia ( $\alpha 4,2$ , $\alpha$ )<br>Homozygote $\alpha$ -Thalassemia ( $\alpha 4,2$ , $\alpha 4,2$ )<br>Heterozygote $\alpha$ -Thalassemia ( $\alpha$ MED, $\alpha$ )<br>Heterozygote $\alpha$ -Thalassemia ( $\alpha 20,5$ , $\alpha$ )<br>Heterozygote $\alpha$ -Thalassemia ( $\alpha$ FIL , $\alpha$ ) |
|                          | HbH disease                 | n/a             | n/a                                                                          | HbH disease                                                                                                                                                                                                                                                                                                                                                                                                                                                                                                                                                                                                                    |
|                          | Alpha Thalassemia NOS       | n/a             | D560                                                                         | n/a                                                                                                                                                                                                                                                                                                                                                                                                                                                                                                                                                                                                                            |
| <b>Beta Thalassemia</b>  |                             |                 |                                                                              |                                                                                                                                                                                                                                                                                                                                                                                                                                                                                                                                                                                                                                |
|                          | Beta Thalassemia minor      | n/a             | D563                                                                         | Heterozygote $\beta$ -Thalassemia<br>Heterozygotic beta deletion<br>Heterozygote for Delta-Beta-Thalassemia<br>Compound Heterozygote $\beta$ -Thalassemia and Heterozygotic HbD                                                                                                                                                                                                                                                                                                                                                                                                                                                |
|                          | Beta Thalassemia intermedia | n/a             | D561C,<br>D563C                                                              | Homozygote $\beta$ -Thalassemia<br>Compound Heterozygote HbE / $\beta$ -Thalassemia                                                                                                                                                                                                                                                                                                                                                                                                                                                                                                                                            |
|                          | Beta Thalassemia major      | n/a             | D561A,<br>D561B                                                              | Homozygote $\beta$ -Thalassemia                                                                                                                                                                                                                                                                                                                                                                                                                                                                                                                                                                                                |
|                          | Thalassemia NOS             | 28249           | D56, D568,<br>D569                                                           | n/a                                                                                                                                                                                                                                                                                                                                                                                                                                                                                                                                                                                                                            |
|                          | HbE trait                   | n/a             | n/a                                                                          | Heterozygote HbE                                                                                                                                                                                                                                                                                                                                                                                                                                                                                                                                                                                                               |
|                          | HbEE disease                | n/a             | D582E                                                                        | Homozygote HbEE                                                                                                                                                                                                                                                                                                                                                                                                                                                                                                                                                                                                                |
| <b>Sickle cell</b>       |                             |                 |                                                                              |                                                                                                                                                                                                                                                                                                                                                                                                                                                                                                                                                                                                                                |
|                          | Sickle cell trait           | n/a             | D573                                                                         | Heterozygote HbS                                                                                                                                                                                                                                                                                                                                                                                                                                                                                                                                                                                                               |
|                          | Sickle cell disease         | 28250           | D57, D570,<br>D571,<br>D572,<br>D572A,<br>D572B,<br>D572C,<br>D572D,<br>D578 | Homozygote HbSS<br>Compound Heterozygote HbS / $\beta$ -Thalassemia<br>Compound Heterozygote HbS / HbC                                                                                                                                                                                                                                                                                                                                                                                                                                                                                                                         |
| <b>Other congenital</b>  |                             |                 |                                                                              |                                                                                                                                                                                                                                                                                                                                                                                                                                                                                                                                                                                                                                |
|                          | G6PD                        | 28229           | D550                                                                         | G6PD deficiency                                                                                                                                                                                                                                                                                                                                                                                                                                                                                                                                                                                                                |
|                          | PKD                         | 28230           | D552                                                                         | PK-deficiency                                                                                                                                                                                                                                                                                                                                                                                                                                                                                                                                                                                                                  |
|                          | Hereditary Spherocytosis    | 28209           | D580,<br>D580A                                                               | n/a                                                                                                                                                                                                                                                                                                                                                                                                                                                                                                                                                                                                                            |
|                          | Hereditary Elliptocytosis   | 28219           | D581,<br>D581A                                                               | n/a                                                                                                                                                                                                                                                                                                                                                                                                                                                                                                                                                                                                                            |
| <b>Poorly defined</b>    |                             |                 |                                                                              |                                                                                                                                                                                                                                                                                                                                                                                                                                                                                                                                                                                                                                |
|                          | Congenital hemolysis NOS    | 28299,<br>28239 | D58, D588,<br>D589                                                           | n/a                                                                                                                                                                                                                                                                                                                                                                                                                                                                                                                                                                                                                            |
|                          | Residual                    | 28258<br>28259  | D582,<br>D582A,<br>D582B,                                                    | Heterozygote HbC<br>Homozygote HbC<br>Heterozygote HbD                                                                                                                                                                                                                                                                                                                                                                                                                                                                                                                                                                         |

|            |                                                          |
|------------|----------------------------------------------------------|
| D582C,     | Homozygote HbDD                                          |
| D582D,     | Heterozygotic other hemoglobin variant                   |
| D588A,     | Rare variant of Alpha1 or Alpha2 gene.                   |
| D55, D551, | Rare variant of Beta-gene                                |
| D553,      | Only genetic changes                                     |
| D558, D559 | HbBart's hydrops foetalis                                |
|            | Unknown variant                                          |
|            | Homozygotic GammaG promotor mutation                     |
|            | Heterozygotic GammaG promotor mutation                   |
|            | Heterozygotic Hereditary persistence of fetal hemoglobin |
|            | Heterozygotic high affinity hemoglobin                   |
|            | Heterozygotic low affinity hemoglobin                    |

---

**Not congenital hemolysis**

|                    |                         |            |          |     |
|--------------------|-------------------------|------------|----------|-----|
| Acquired hemolysis | 28309,                  | D59, D590, | n/a      |     |
|                    | 28390,                  | D591,      |          |     |
|                    | 28391,                  | 591A,      |          |     |
|                    | 28392,                  | D592,      |          |     |
|                    | 28393,                  | D593,      |          |     |
|                    | 28394,                  | D594,      |          |     |
|                    | 28395,                  | D594C,     |          |     |
|                    | 28399                   | D596A,D59  |          |     |
|                    | Immune thrombocytopenia | 28710,     | 8, D599, | n/a |
|                    |                         | 28711,     | D693     |     |
| 28718,             |                         |            |          |     |
| 28719              |                         |            |          |     |

---

ICD-8 and ICD-10 codes used to define the extraction and grouping of diseases from the Danish National Patient

Register and the laboratory database to form the cohort. The suffixes “A”, “B”, “C” and “D” is a Danish adaptation in the ICD-10 system. The acquired hemolysis codes and the ITP codes are included to identify patients with acquired hemolysis, which are excluded from this study. The Herlev Laboratory Database include laboratory test of hemoglobinopathies and enzymopathies, hence Hereditary Spherocytosis and Elliptocytosis are based on diagnosis in the Danish National Patient Register. The list of diagnoses therefore include diagnosis made by the laboratory and their association with a corresponding ICD-8/10 diagnosis. The diagnoses made by the laboratory are based on hemoglobin separation based on high-pressure liquid chromatography (HPLC) and subsequent verification of genetic abnormalities in the alpha- and beta-globin genes by polymerase chain reaction. Enzymopathies are diagnosed by enzyme activity assays (G6PD) or genetic sequencing (PKD). Specifications of the test can be provided by the corresponding author or by direct contact to the hemolysis laboratory. G6PD: Glucose-6-phosphate-deficiency, HbH: hemoglobin H, deficiency, HbC: heterozygotic hemoglobin C, HbCC: homozygotic hemoglobin C, HbD: heterozygotic hemoglobin D, HbDD: homozygotic hemoglobin D, HbE: heterozygotic hemoglobin E, HbEE: homozygotic hemoglobin EE, HbS: heterozygotic hemoglobin S, n/a: not applicable, ICD: International classification of diseases, NOS: Not otherwise specified, PKD: Pyruvate kinase



## Supplementary table 2 – Comparison of the population of diagnosis and agreement of diagnosis between main model and sensitivity model

| Disease                     | Subgroup                         | Main model, count | Sensitivity model, count | Agreement | Recall | PPV (%) |
|-----------------------------|----------------------------------|-------------------|--------------------------|-----------|--------|---------|
| Alpha Thalassemia NOS       |                                  | 70                | 227                      | 70        | 100.0  | 30.8    |
| Alpha Thalassemia trait     |                                  | 1477              | n/a                      | 0         | 0.0    | .       |
| Beta Thalassemia intermedia |                                  | 31                | 14                       | 11        | 35.5   | 78.6    |
| Beta Thalassemia minor      |                                  | 2566              | 1130                     | 998       | 38.9   | 88.3    |
| Beta thalassemia major      |                                  | 52                | 37                       | 29        | 55.8   | 78.4    |
| Congenital hemolysis NOS    |                                  | 1316              | 1470                     | 1316      | 100.0  | 89.5    |
| G6PD                        |                                  | 383               | 336                      | 323       | 84.3   | 96.1    |
| HbE trait                   |                                  | 434               | n/a                      | 0         | 0.0    | .       |
| HbEE disease                |                                  | 107               | <3                       | 0         | 0.0    | 0.0     |
| HbH disease                 |                                  | 52                | n/a                      | 0         | 0.0    | .       |
| Hereditary spherocytosis    |                                  | 1289              | 1230                     | 1224      | 95.0   | 99.5    |
| PKD                         |                                  | 37                | 28                       | 28        | 75.7   | 100.0   |
| Sickle cell disease         |                                  | 236               | 251                      | 206       | 87.3   | 82.1    |
| Sickle cell trait           |                                  | 635               | 66                       | 63        | 9.9    | 95.5    |
| Thalassemia NOS             |                                  | 267               | 522                      | 260       | 97.4   | 49.8    |
| Residual                    |                                  | 1059              | 690                      | 653       | 61.5   | 94.6    |
|                             | <i>Elliptocytosis</i>            | 44                | 42                       | 40        |        |         |
|                             | <i>HbBart's hydrops foetalis</i> | <3                | <3                       | <3        |        |         |
|                             | <i>HbC and HbCC disease</i>      | 100               | 0                        | 0         |        |         |
|                             | <i>HbD and HbDD disease</i>      | 115               | <3                       | <3        |        |         |
|                             | <i>Other enzymopathy</i>         | 405               | 406                      | 397       |        |         |
|                             | <i>Other hemoglobinopathy</i>    | 388               | 235                      | 206       |        |         |
|                             | <i>Stomatocytosis</i>            | 7                 | 5                        | 5         |        |         |

The total number of patients identified by the two models (main and sensitivity) is listed along with the agreement. The recall denotes the number of patients and percentage of patients identified by both models compared with the number identified by the main model—i.e. the probability that a patient identified by the main model will be identified by the sensitivity model. The positive predictive value (PPV) is

calculated as the number of patients identified by both models compared with the numbers of patients identified by the sensitivity model—  
i.e. the probability that a patient identified by the sensitivity model will be identified by the main model. Cells with less than three persons  
is anonymized to “<3”, hence the Residual total in the main model column do not include the Bart’s hydrops foetalis.

G6PD: Glucose-6-phosphate-deficiency, HbH: hemoglobin H, deficiency, HbC: heterozygotic hemoglobin C, HbCC: homozygotic  
hemoglobin C, HbD: heterozygotic hemoglobin D, HbDD: homozygotic hemoglobin D, HbE: heterozygotic hemoglobin E, HbEE:  
homozygotic hemoglobin EE, HbS: heterozygotic hemoglobin S, n/a: not applicable, NOS: Not otherwise specified, PKD: Pyruvate kinase

**Supplementary table 3 - Characteristics of patients with congenital hemolytic disorders in Denmark 2000-2016**

|                                        | HbE n=434         | HbEE disease<br>n=107 | G6PD n=383        | PKD n=37          | Congenital<br>hemolysis NOS<br>n=1316 | Residual n=1061   |
|----------------------------------------|-------------------|-----------------------|-------------------|-------------------|---------------------------------------|-------------------|
| Women (% [95% CI])                     | 77.9 [73.7; 81.7] | 88.8 [81.2; 94.1]     | 28.5 [24.0; 33.3] | 40.5 [24.8; 57.9] | 53.8 [51.1; 56.5]                     | 59.0 [56.0; 62.0] |
| Danish origin (% [95% CI])             | 14.7 [11.5; 18.4] | 6.5 [2.7; 13.0]       | 29.2 [24.7; 34.1] | 89.2 [74.6; 97.0] | 92.2 [90.6; 93.6]                     | 63.6 [60.6; 66.5] |
| Splenectomized after 1977 (% [95% CI]) | 0.2 [0.0; 1.3]    | 0.0 [0.0; 3.4]        | 1.3 [0.4; 3.0]    | 27.0 [13.8; 44.1] | 8.1 [6.6; 9.7]                        | 1.8 [1.1; 2.8]    |
| Age at diagnosis (median (IQR))        | 32.7 (25.1; 42.6) | 35.5 (28.6; 46.9)     | 6.4 (1.9; 30.2)   | 18.5 (3.9; 65.2)  | 67.3 (44.3; 78.0)                     | 50.8 (29.3; 72.8) |

Basic description of included patients with congenital hemolysis, subgroups not included in primary section of the article.

Abbreviation: CI: confidence interval, G6PD: Glucose-6-phosphate-deficiency, IQR: interquartile range, HbE: heterozygotic hemoglobin

E, HbEE: homozygotic hemoglobin EE, NOS: Not otherwise specified, PKD: Pyruvate kinase.

### Supplementary table 4 - Prevalence of other congenital hemolytic disorders in Denmark in 2000, 2007 and 2015

|                          |           | Prevalence per 100,000 persons [95% CI] |                     |                      |
|--------------------------|-----------|-----------------------------------------|---------------------|----------------------|
|                          |           | 2000                                    | 2007                | 2015                 |
| Congenital hemolysis NOS |           |                                         |                     |                      |
|                          | All       | 5.82 [5.19; 6.50]                       | 5.20 [4.61; 5.84]   | 5.12 [4.55; 5.75]    |
|                          | Age < 20  | 7.76 [6.30; 9.46]                       | 9.05 [7.51; 10.81]  | 10.95 [9.23; 12.89]  |
|                          | Age 20-50 | 4.76 [3.92; 5.72]                       | 4.78 [3.92; 5.77]   | 4.85 [3.99; 5.84]    |
|                          | Age > 50  | 5.84 [4.75; 7.10]                       | 2.92 [2.19; 3.81]   | 1.70 [1.19; 2.37]    |
| G6PD                     |           |                                         |                     |                      |
|                          | All       | 1.80 [1.46; 2.20]                       | 3.34 [2.87; 3.86]   | 4.52 [3.99; 5.11]    |
|                          | Age < 20  | 6.34 [5.02; 7.89]                       | 11.52 [9.77; 13.49] | 15.28 [13.24; 17.54] |
|                          | Age 20-50 | 0.59 [0.33; 1.00]                       | 1.02 [0.65; 1.53]   | 1.75 [1.25; 2.38]    |
|                          | Age > 50  | 0.12 [0.01; 0.42]                       | 0.27 [0.09; 0.63]   | 0.73 [0.41; 1.20]    |
| PKD                      |           |                                         |                     |                      |
|                          | All       | 0.21 [0.10; 0.37]                       | 0.29 [0.17; 0.48]   | 0.42 [0.27; 0.63]    |
|                          | Age < 20  | 0.63 [0.27; 1.25]                       | 0.82 [0.41; 1.47]   | 1.29 [0.75; 2.07]    |
|                          | Age 20-50 | 0.08 [0.01; 0.31]                       | 0.09 [0.01; 0.32]   | 0.13 [0.03; 0.38]    |
|                          | Age > 50  | 0.06 [0.00; 0.33]                       | 0.16 [0.03; 0.47]   | 0.19 [0.05; 0.50]    |
| HbE                      |           |                                         |                     |                      |
|                          | All       | 0.41 [0.26; 0.62]                       | 1.67 [1.35; 2.05]   | 5.65 [5.05; 6.31]    |
|                          | Age < 20  | 0.32 [0.09; 0.81]                       | 1.72 [1.09; 2.58]   | 4.86 [3.75; 6.21]    |
|                          | Age 20-50 | 0.76 [0.45; 1.21]                       | 3.01 [2.34; 3.81]   | 9.39 [8.18; 10.73]   |
|                          | Age > 50  | 0.00 [0.00; 0.22]                       | 0.00 [0.00; 0.20]   | 2.00 [1.43; 2.71]    |
| HbEE disease             |           |                                         |                     |                      |
|                          | All       | 0.04 [0.00; 0.14]                       | 0.40 [0.25; 0.61]   | 1.27 [1.00; 1.60]    |
|                          | Age < 20  | 0.00 [0.00; 0.29]                       | 0.00 [0.00; 0.28]   | 0.68 [0.31; 1.30]    |
|                          | Age 20-50 | 0.08 [0.01; 0.31]                       | 0.93 [0.58; 1.42]   | 2.31 [1.73; 3.03]    |
|                          | Age > 50  | 0.00 [0.00; 0.22]                       | 0.05 [0.00; 0.30]   | 0.49 [0.23; 0.90]    |
| Residual                 |           |                                         |                     |                      |
|                          | All       | 2.05 [1.68; 2.47]                       | 4.20 [3.68; 4.79]   | 10.16 [9.35; 11.02]  |
|                          | Age < 20  | 2.46 [1.67; 3.49]                       | 4.04 [3.03; 5.27]   | 8.51 [7.01; 10.24]   |
|                          | Age 20-50 | 1.57 [1.11; 2.17]                       | 4.03 [3.24; 4.94]   | 11.44 [10.10; 12.92] |
|                          | Age > 50  | 2.39 [1.72; 3.25]                       | 4.54 [3.62; 5.62]   | 9.78 [8.48; 11.23]   |

Prevalence of congenital hemolysis, subgroups not included in primary section of the article.

Estimated as the number of living persons assigned the diagnosis at the latest on the 1st of January each of the years 2000, 2007 and 2015 stratified by age and sex with population denominators derived from census data.

Abbreviation: CI: confidence interval, G6PD: Glucose-6-phosphate-deficiency, IQR: interquartile range, HbE: heterozygotic hemoglobin E, HbEE: homozygotic hemoglobin EE, NOS: Not otherwise specified, PKD: Pyruvate kinase deficiency.



**Supplementary table 5 - Table of sex-specific prevalence of congenital hemolytic anemias in Denmark in 2000, 2007 and 2015**

|                                 |        | Prevalence per 100,000 persons [95% CI] |                      |                      |
|---------------------------------|--------|-----------------------------------------|----------------------|----------------------|
|                                 |        | 2000                                    | 2007                 | 2015                 |
| <b>Alpha Thalassemia</b>        |        |                                         |                      |                      |
| Alpha Thalassemia trait         |        |                                         |                      |                      |
|                                 | Female | 0.63 [0.37; 1.01]                       | 10.83 [9.64; 12.14]  | 28.61 [26.68; 30.64] |
|                                 | Male   | 0.30 [0.13; 0.60]                       | 2.60 [2.02; 3.28]    | 9.71 [8.59; 10.93]   |
| HbH disease                     |        |                                         |                      |                      |
|                                 | Female | 0.11 [0.02; 0.33]                       | 0.40 [0.20; 0.72]    | 0.88 [0.57; 1.30]    |
|                                 | Male   | 0.00 [0.00; 0.14]                       | 0.15 [0.04; 0.38]    | 0.60 [0.35; 0.97]    |
| Alpha Thalassemia NOS           |        |                                         |                      |                      |
|                                 | Female | 0.26 [0.10; 0.53]                       | 0.47 [0.25; 0.81]    | 1.16 [0.80; 1.63]    |
|                                 | Male   | 0.15 [0.04; 0.39]                       | 0.37 [0.18; 0.68]    | 0.64 [0.38; 1.01]    |
| <b>Beta Thalassemia</b>         |        |                                         |                      |                      |
| Beta Thalassemia minor          |        |                                         |                      |                      |
|                                 | Female | 5.90 [5.02; 6.89]                       | 19.02 [17.42; 20.72] | 40.79 [38.48; 43.20] |
|                                 | Male   | 2.96 [2.34; 3.70]                       | 11.79 [10.53; 13.16] | 28.96 [27.00; 31.02] |
| Beta Thalassemia intermedia     |        |                                         |                      |                      |
|                                 | Female | 0.04 [0.00; 0.21]                       | 0.07 [0.01; 0.26]    | 0.56 [0.32; 0.91]    |
|                                 | Male   | 0.00 [0.00; 0.14]                       | 0.11 [0.02; 0.33]    | 0.32 [0.15; 0.61]    |
| Beta thalassemia major          |        |                                         |                      |                      |
|                                 | Female | 0.04 [0.00; 0.21]                       | 0.51 [0.28; 0.85]    | 0.98 [0.65; 1.42]    |
|                                 | Male   | 0.00 [0.00; 0.14]                       | 0.11 [0.02; 0.33]    | 0.39 [0.20; 0.70]    |
| Thalassemia NOS                 |        |                                         |                      |                      |
|                                 | Female | 1.82 [1.34; 2.40]                       | 2.73 [2.14; 3.42]    | 3.83 [3.14; 4.62]    |
|                                 | Male   | 1.29 [0.89; 1.80]                       | 2.15 [1.63; 2.78]    | 2.74 [2.16; 3.42]    |
| <b>Other defined congenital</b> |        |                                         |                      |                      |
| Sickle cell trait               |        |                                         |                      |                      |
|                                 | Female | 1.08 [0.72; 1.54]                       | 2.87 [2.27; 3.58]    | 10.85 [9.67; 12.13]  |
|                                 | Male   | 0.34 [0.16; 0.65]                       | 1.37 [0.97; 1.89]    | 5.34 [4.52; 6.26]    |
| Sickle cell disease             |        |                                         |                      |                      |
|                                 | Female | 0.82 [0.51; 1.24]                       | 1.49 [1.07; 2.02]    | 2.98 [2.38; 3.69]    |
|                                 | Male   | 0.23 [0.08; 0.50]                       | 0.82 [0.51; 1.24]    | 2.42 [1.88; 3.07]    |
| Hereditary spherocytosis        |        |                                         |                      |                      |
|                                 | Female | 10.05 [8.89; 11.32]                     | 13.42 [12.08; 14.86] | 17.13 [15.64; 18.72] |
|                                 | Male   | 10.44 [9.24; 11.75]                     | 14.13 [12.75; 15.62] | 18.32 [16.77; 19.97] |
| Congenital hemolysis NOS        |        |                                         |                      |                      |
|                                 | Female | 6.34 [5.43; 7.37]                       | 5.16 [4.35; 6.09]    | 4.81 [4.04; 5.69]    |
|                                 | Male   | 5.28 [4.44; 6.23]                       | 5.23 [4.40; 6.17]    | 5.44 [4.61; 6.38]    |
| G6PD                            |        |                                         |                      |                      |
|                                 | Female | 0.59 [0.34; 0.96]                       | 1.53 [1.10; 2.06]    | 2.63 [2.07; 3.30]    |
|                                 | Male   | 3.04 [2.41; 3.78]                       | 5.19 [4.37; 6.13]    | 6.44 [5.54; 7.45]    |
| PKD                             |        |                                         |                      |                      |
|                                 | Female | 0.22 [0.08; 0.48]                       | 0.29 [0.13; 0.57]    | 0.42 [0.22; 0.74]    |
|                                 | Male   | 0.19 [0.06; 0.44]                       | 0.30 [0.13; 0.58]    | 0.43 [0.22; 0.75]    |
| HbE                             |        |                                         |                      |                      |
|                                 | Female | 0.67 [0.40; 1.06]                       | 2.62 [2.05; 3.30]    | 8.57 [7.52; 9.71]    |
|                                 | Male   | 0.15 [0.04; 0.39]                       | 0.70 [0.42; 1.10]    | 2.70 [2.13; 3.38]    |
| HbEE disease                    |        |                                         |                      |                      |
|                                 | Female | 0.07 [0.01; 0.27]                       | 0.73 [0.44; 1.12]    | 2.32 [1.79; 2.95]    |
|                                 | Male   | 0.00 [0.00; 0.14]                       | 0.07 [0.01; 0.27]    | 0.21 [0.08; 0.46]    |
| Residual                        |        |                                         |                      |                      |
|                                 | Female | 2.71 [2.12; 3.40]                       | 5.49 [4.65; 6.44]    | 12.60 [11.33; 13.98] |
|                                 | Male   | 1.37 [0.96; 1.89]                       | 2.89 [2.29; 3.61]    | 7.68 [6.69; 8.78]    |

Prevalences of congenital hemolysis stratified for all subgroups. Estimated as the number of living persons assigned the diagnosis up to January each of the years 2000, 2007 and 2015 stratified by age and sex with population denominators derived from census data.

Abbreviation: CI: confidence interval, G6PD: Glucose-6-phosphate-deficiency, IQR: interquartile range, HbH: hemoglobin H, HbE: heterozygotic hemoglobin E, HbEE: homozygotic hemoglobin EE, NOS: Not otherwise specified, PKD: Pyruvate kinase deficiency.

**Supplementary table 6 – Prevalence proportion ratio for prevalence of alpha-thalassemic diseases by the main model, Denmark 2000-2016**

|      | Alpha thalassemia trait | Hemoglobin H disease | Alpha thalassemia NOS |
|------|-------------------------|----------------------|-----------------------|
| PPR  |                         |                      |                       |
| 2000 | 1.00 <sup>a</sup>       | 1.00 <sup>a</sup>    | 1.00 <sup>a</sup>     |
| 2001 | 2.35 [1.47,3.75]        | 1.99 [0.50,7.97]     | 1.27 [0.58,2.79]      |
| 2002 | 4.85 [3.15,7.45]        | 1.99 [0.50,7.94]     | 1.35 [0.62,2.95]      |
| 2003 | 6.77 [4.45,10.30]       | 2.64 [0.70,9.95]     | 1.53 [0.72,3.27]      |
| 2004 | 8.65 [5.72,13.08]       | 3.29 [0.91,11.96]    | 1.80 [0.86,3.75]      |
| 2005 | 10.64 [7.06,16.02]      | 4.27 [1.22,14.98]    | 1.79 [0.86,3.74]      |
| 2006 | 12.65 [8.42,19.00]      | 4.58 [1.32,15.95]    | 2.05 [1.00,4.21]      |
| 2007 | 14.40 [9.61,21.60]      | 4.89 [1.42,16.90]    | 2.05 [1.00,4.20]      |
| 2008 | 15.50 [10.34,23.21]     | 5.19 [1.51,17.82]    | 2.12 [1.04,4.34]      |
| 2009 | 17.45 [11.66,26.10]     | 5.16 [1.50,17.70]    | 2.37 [1.18,4.79]      |
| 2010 | 19.84 [13.28,29.64]     | 5.78 [1.70,19.62]    | 2.71 [1.36,5.40]      |
| 2011 | 23.12 [15.50,34.49]     | 7.35 [2.21,24.47]    | 3.14 [1.60,6.16]      |
| 2012 | 26.86 [18.02,40.02]     | 9.23 [2.81,30.31]    | 3.47 [1.78,6.77]      |
| 2013 | 31.01 [20.83,46.17]     | 9.20 [2.80,30.19]    | 3.63 [1.87,7.05]      |
| 2014 | 35.84 [24.09,53.32]     | 11.05 [3.40,35.93]   | 3.62 [1.86,7.02]      |
| 2015 | 40.98 [27.57,60.93]     | 13.18 [4.09,42.54]   | 4.37 [2.28,8.38]      |
| 2016 | 45.95 [30.92,68.27]     | 14.63 [4.55,47.01]   | 4.75 [2.49,9.07]      |

Exponentiated coefficients from Poisson regression; 95% confidence intervals in brackets.

The overall prevalence of alpha thalassemic diseases calculated on 1st of January each year with census data as denominator.

Abbreviations: <sup>a</sup>Reference value, NOS: not otherwise specified, PPR: Prevalence proportion ratio.

### Supplementary table 7 – Prevalence proportion ratio for prevalence of beta-thalassaemic diseases by the main model, in Denmark 2000-2016

|      | Beta thalassaemia minor | Beta thalassaemia intermedia | Beta thalassaemia major | Thalassaemia NOS  |
|------|-------------------------|------------------------------|-------------------------|-------------------|
| PPR  |                         |                              |                         |                   |
| 2000 | 1.00 <sup>a</sup>       | 1.00 <sup>a</sup>            | 1.00 <sup>a</sup>       | 1.00 <sup>a</sup> |
| 2001 | 1.27 [1.07,1.51]        | 1.99 [0.18,21.98]            | 1.00 [0.06,15.93]       | 1.07 [0.79,1.44]  |
| 2002 | 1.57 [1.33,1.84]        | 1.99 [0.18,21.90]            | 0.99 [0.06,15.87]       | 1.17 [0.88,1.57]  |
| 2003 | 1.82 [1.55,2.13]        | 1.98 [0.18,21.84]            | 1.98 [0.18,21.84]       | 1.28 [0.96,1.70]  |
| 2004 | 2.22 [1.90,2.58]        | 2.96 [0.31,28.48]            | 6.91 [0.85,56.18]       | 1.31 [0.98,1.74]  |
| 2005 | 2.58 [2.22,3.00]        | 2.95 [0.31,28.41]            | 8.86 [1.12,69.97]       | 1.45 [1.10,1.91]  |
| 2006 | 3.00 [2.59,3.47]        | 3.93 [0.44,35.15]            | 13.75 [1.81,104.55]     | 1.50 [1.14,1.98]  |
| 2007 | 3.47 [3.01,4.01]        | 4.89 [0.57,41.88]            | 16.63 [2.21,125.00]     | 1.57 [1.19,2.06]  |
| 2008 | 3.79 [3.29,4.37]        | 4.87 [0.57,41.66]            | 16.55 [2.20,124.34]     | 1.61 [1.22,2.11]  |
| 2009 | 4.13 [3.58,4.75]        | 8.70 [1.10,68.70]            | 17.41 [2.32,130.40]     | 1.71 [1.31,2.24]  |
| 2010 | 4.68 [4.07,5.38]        | 8.67 [1.10,68.41]            | 20.22 [2.72,150.34]     | 1.75 [1.34,2.29]  |
| 2011 | 5.28 [4.60,6.06]        | 13.42 [1.76,102.05]          | 22.05 [2.98,163.25]     | 1.89 [1.45,2.47]  |
| 2012 | 5.88 [5.13,6.75]        | 15.28 [2.03,115.23]          | 21.97 [2.97,162.66]     | 1.94 [1.50,2.53]  |
| 2013 | 6.55 [5.71,7.50]        | 16.17 [2.15,121.52]          | 30.44 [4.16,222.79]     | 1.98 [1.53,2.58]  |
| 2014 | 7.28 [6.36,8.33]        | 21.79 [2.94,161.31]          | 34.10 [4.68,248.70]     | 2.07 [1.59,2.68]  |
| 2015 | 7.85 [6.86,8.98]        | 23.54 [3.19,173.75]          | 36.73 [5.05,267.33]     | 2.11 [1.63,2.73]  |
| 2016 | 8.61 [7.53,9.84]        | 26.15 [3.56,192.19]          | 42.03 [5.79,304.87]     | 2.09 [1.62,2.71]  |

Exponentiated coefficients from Poisson regression; 95% confidence intervals in brackets.

The overall prevalence of beta thalassaemic diseases calculated on 1st of January each year with census data as denominator.

Abbreviations: <sup>a</sup>Reference value, NOS: not otherwise specified, PPR: Prevalence proportion ratio.

### Supplementary table 8 – Prevalence proportion ratio for prevalence of sickle cell and hereditary spherocytosis by the main model, in Denmark 2000-2016

|      | Sickle cell trait  | Sickle cell disease | Hereditary spherocytosis |
|------|--------------------|---------------------|--------------------------|
| PPR  |                    |                     |                          |
| 2000 | 1.00 <sup>a</sup>  | 1.00 <sup>a</sup>   | 1.00 <sup>a</sup>        |
| 2001 | 1.21 [0.78,1.85]   | 1.14 [0.69,1.89]    | 1.05 [0.93,1.18]         |
| 2002 | 1.54 [1.03,2.32]   | 1.24 [0.76,2.04]    | 1.10 [0.98,1.23]         |
| 2003 | 1.69 [1.13,2.53]   | 1.49 [0.92,2.40]    | 1.14 [1.02,1.28]         |
| 2004 | 1.95 [1.32,2.88]   | 1.80 [1.13,2.85]    | 1.18 [1.05,1.32]         |
| 2005 | 2.18 [1.48,3.19]   | 2.04 [1.30,3.20]    | 1.22 [1.09,1.37]         |
| 2006 | 2.71 [1.87,3.93]   | 2.07 [1.32,3.24]    | 1.28 [1.14,1.43]         |
| 2007 | 2.99 [2.07,4.31]   | 2.20 [1.41,3.44]    | 1.34 [1.20,1.50]         |
| 2008 | 3.46 [2.41,4.96]   | 2.43 [1.57,3.77]    | 1.40 [1.25,1.56]         |
| 2009 | 3.92 [2.75,5.59]   | 2.52 [1.63,3.90]    | 1.44 [1.29,1.60]         |
| 2010 | 4.49 [3.16,6.37]   | 2.96 [1.93,4.53]    | 1.50 [1.34,1.67]         |
| 2011 | 5.20 [3.68,7.34]   | 3.25 [2.13,4.96]    | 1.53 [1.37,1.70]         |
| 2012 | 6.31 [4.49,8.87]   | 3.68 [2.43,5.58]    | 1.56 [1.40,1.74]         |
| 2013 | 8.09 [5.78,11.32]  | 3.91 [2.59,5.91]    | 1.62 [1.46,1.80]         |
| 2014 | 9.67 [6.93,13.49]  | 4.53 [3.02,6.81]    | 1.70 [1.53,1.89]         |
| 2015 | 11.38 [8.17,15.84] | 5.15 [3.44,7.70]    | 1.73 [1.56,1.92]         |
| 2016 | 12.90 [9.28,17.93] | 5.57 [3.73,8.31]    | 1.78 [1.61,1.98]         |

Exponentiated coefficients from Poisson regression; 95% confidence intervals in brackets.

The overall prevalence of sickle cell disorders and hereditary spherocytosis calculated on 1st of January each year with census data as denominator.

Abbreviations: <sup>a</sup>Reference value, PPR: Prevalence proportion ratio.

### Supplementary table 9 – Prevalence proportion ratio for prevalence of other congenital hemolytic anemias by the main model, in Denmark 2000-2016

|      | HbE                 | HbEE disease         | G6PD              | PKD               | Congenital hemolysis NOS | Residual hemolysis |
|------|---------------------|----------------------|-------------------|-------------------|--------------------------|--------------------|
| PPR  |                     |                      |                   |                   |                          |                    |
| 2000 | 1.00 <sup>a</sup>   | 1.00 <sup>a</sup>    | 1.00 <sup>a</sup> | 1.00 <sup>a</sup> | 1.00 <sup>a</sup>        | 1.00 <sup>a</sup>  |
| 2001 | 1.40 [0.81,2.42]    | 1.49 [0.25,8.94]     | 1.17 [0.89,1.54]  | 1.27 [0.58,2.79]  | 0.99 [0.85,1.16]         | 1.04 [0.80,1.36]   |
| 2002 | 1.81 [1.07,3.04]    | 2.48 [0.48,12.79]    | 1.27 [0.97,1.66]  | 1.26 [0.57,2.78]  | 0.98 [0.84,1.15]         | 1.19 [0.93,1.54]   |
| 2003 | 2.21 [1.33,3.65]    | 2.97 [0.60,14.72]    | 1.38 [1.06,1.80]  | 1.17 [0.52,2.61]  | 0.95 [0.81,1.11]         | 1.34 [1.05,1.72]   |
| 2004 | 2.74 [1.68,4.46]    | 4.44 [0.96,20.57]    | 1.45 [1.12,1.88]  | 1.17 [0.52,2.60]  | 0.93 [0.79,1.09]         | 1.59 [1.25,2.01]   |
| 2005 | 3.18 [1.97,5.13]    | 6.40 [1.44,28.37]    | 1.58 [1.22,2.04]  | 1.43 [0.66,3.09]  | 0.92 [0.79,1.08]         | 1.77 [1.40,2.24]   |
| 2006 | 3.57 [2.23,5.72]    | 8.35 [1.93,36.13]    | 1.73 [1.35,2.22]  | 1.34 [0.62,2.92]  | 0.92 [0.78,1.07]         | 1.91 [1.52,2.41]   |
| 2007 | 4.05 [2.54,6.45]    | 10.76 [2.53,45.77]   | 1.86 [1.45,2.38]  | 1.42 [0.66,3.07]  | 0.89 [0.76,1.05]         | 2.06 [1.64,2.58]   |
| 2008 | 4.47 [2.82,7.09]    | 11.68 [2.76,49.42]   | 1.92 [1.50,2.45]  | 1.50 [0.70,3.21]  | 0.89 [0.76,1.05]         | 2.27 [1.81,2.84]   |
| 2009 | 4.88 [3.09,7.71]    | 13.06 [3.10,54.90]   | 1.99 [1.56,2.55]  | 1.76 [0.84,3.67]  | 0.88 [0.75,1.03]         | 2.45 [1.96,3.06]   |
| 2010 | 5.38 [3.42,8.48]    | 14.93 [3.57,62.37]   | 2.08 [1.63,2.65]  | 1.93 [0.93,3.97]  | 0.89 [0.76,1.04]         | 2.73 [2.19,3.40]   |
| 2011 | 6.19 [3.95,9.69]    | 17.25 [4.15,71.66]   | 2.17 [1.70,2.76]  | 2.09 [1.02,4.27]  | 0.88 [0.75,1.04]         | 3.06 [2.47,3.79]   |
| 2012 | 6.82 [4.36,10.65]   | 21.97 [5.33,90.49]   | 2.26 [1.78,2.87]  | 2.00 [0.97,4.10]  | 0.86 [0.73,1.01]         | 3.43 [2.77,4.24]   |
| 2013 | 7.65 [4.91,11.92]   | 25.69 [6.26,105.35]  | 2.38 [1.88,3.01]  | 1.99 [0.97,4.08]  | 0.86 [0.73,1.01]         | 3.87 [3.14,4.77]   |
| 2014 | 10.16 [6.56,15.73]  | 30.78 [7.54,125.72]  | 2.45 [1.93,3.10]  | 2.24 [1.11,4.53]  | 0.87 [0.74,1.02]         | 4.26 [3.46,5.24]   |
| 2015 | 13.70 [8.89,21.10]  | 33.90 [8.32,138.18]  | 2.51 [1.99,3.18]  | 2.05 [1.01,4.19]  | 0.88 [0.75,1.03]         | 4.97 [4.05,6.10]   |
| 2016 | 16.17 [10.52,24.86] | 40.62 [10.00,165.03] | 2.65 [2.10,3.34]  | 2.12 [1.04,4.31]  | 0.90 [0.77,1.05]         | 5.53 [4.52,6.78]   |

Exponentiated coefficients from Poisson regression; 95% confidence intervals in brackets.

The overall prevalence of other congenital hemolytic disorders calculated on 1st of January each year with census data as denominator. Abbreviations: <sup>a</sup>Reference value, G6PD: Glucose-6-phosphate-deficiency, PKD: Pyruvate kinase deficiency, PPR: Prevalence proportion ratio, NOS: Not otherwise specified, HbE: heterozygotic hemoglobin E, HbEE homozygotic hemoglobin E.

## Supplementary figures

Supplementary Figure 1 – flowchart for assigning diagnosis of all congenital hemolytic disorders

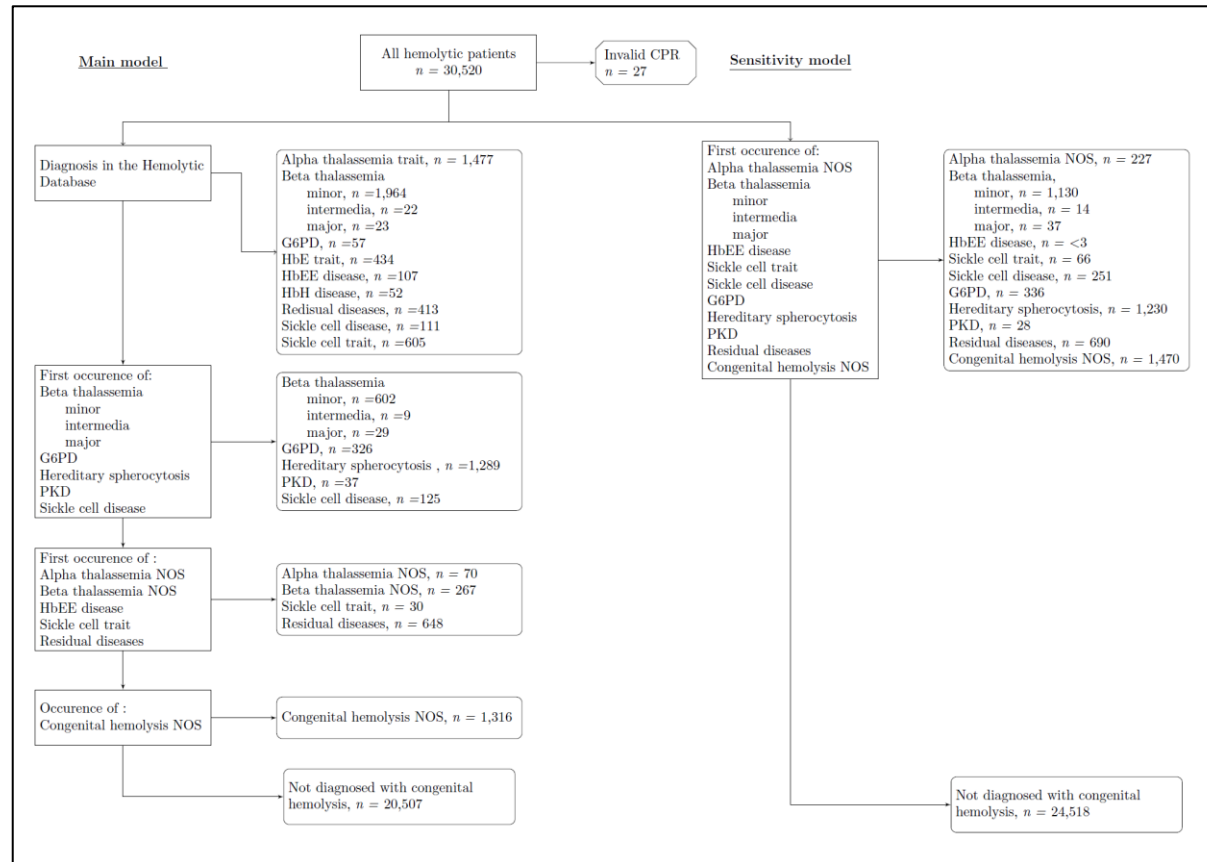

Flow chart illustrating the process of assigning diagnoses of congenital hemolysis to patients. We used the two models consecutively on the cohort of 30,520 patients. The main model, on the left, uses a hierarchy to assign a diagnosis to a patient. Only patients who cannot be assigned a diagnosis proceed from each level. Patients with two equally reliable diagnoses in the Danish National Patient Register were



assigned the chronologically first recorded diagnosis. On the right, results of using the sensitivity model where patients were classified only according to the chronologically first recorded diagnosis code compatible with acquired hemolytic anemias. The sensitivity model only employs the Danish National Patient Register as source for diagnosing, and it is therefore missing all diagnoses not defined in the International Classification of Diseases 8<sup>th</sup> or 10<sup>th</sup> revision (e.g. heterozygotic hemoglobin C, D or E).

Abbreviations: G6PD: Glucose-6-phosphate-deficiency, HbH: hemoglobin H, deficiency, HbC: heterozygotic hemoglobin C, HbCC: homozygotic hemoglobin C, HbD: heterozygotic hemoglobin D, HbDD: homozygotic hemoglobin D, HbE: heterozygotic hemoglobin E, HbEE: homozygotic hemoglobin EE, HbS: heterozygotic hemoglobin S, NOS: Not otherwise specified, PKD: Pyruvate kinase deficiency.

## Supplementary Figure 2 - Development of Citizens on non-Danish origin, 2000 to 2019

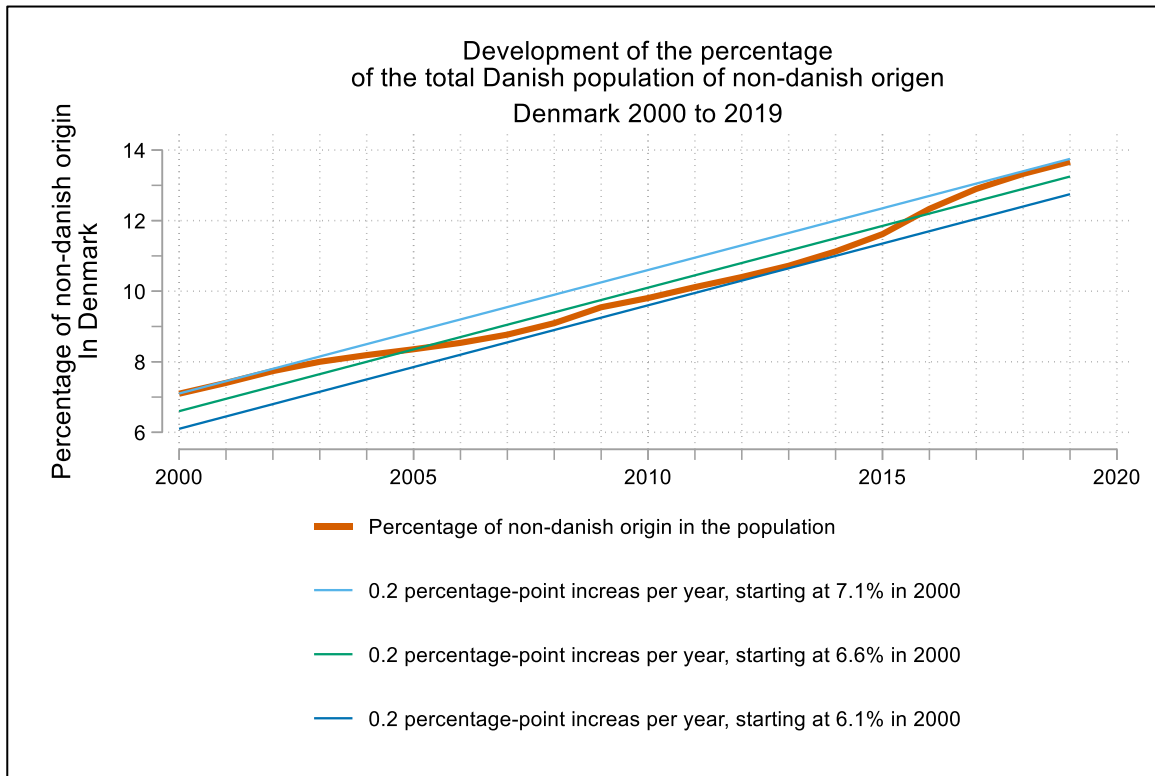

Development in the amount of the inhabitants in Denmark of non-Danish origin. Calculated as the number of people of non-Danish origin living in Denmark on the 1<sup>st</sup> of January each year, divided by the total population in Denmark on the same date.

**Supplementary Figure 3 - Prevalence of congenital hemolysis NOS in Denmark, 2000-2016, according to models for classification of diagnosis (main model vs. sensitivity model)**

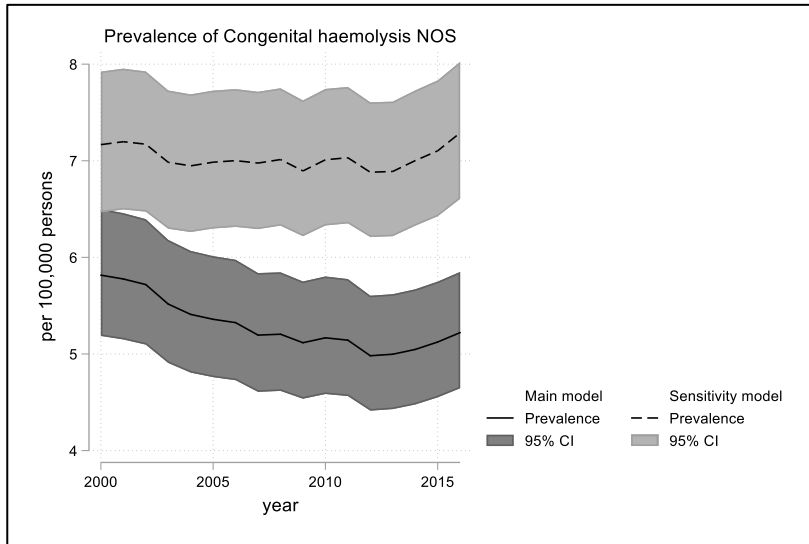

The overall prevalence with 95% confidence intervals for congenital hemolysis NOS calculated on 1st of January each year with census data as denominator. The 95% confidence intervals are calculated using the Clopper-Pearson method. Abbreviation: CI: confidence interval, NOS: not otherwise specified.

**Supplementary Figure 4 - Prevalence of Glucose-6-phosphatase-deficiency in Denmark, 2000-2016, according to models for classification of diagnosis (main model vs. sensitivity model)**

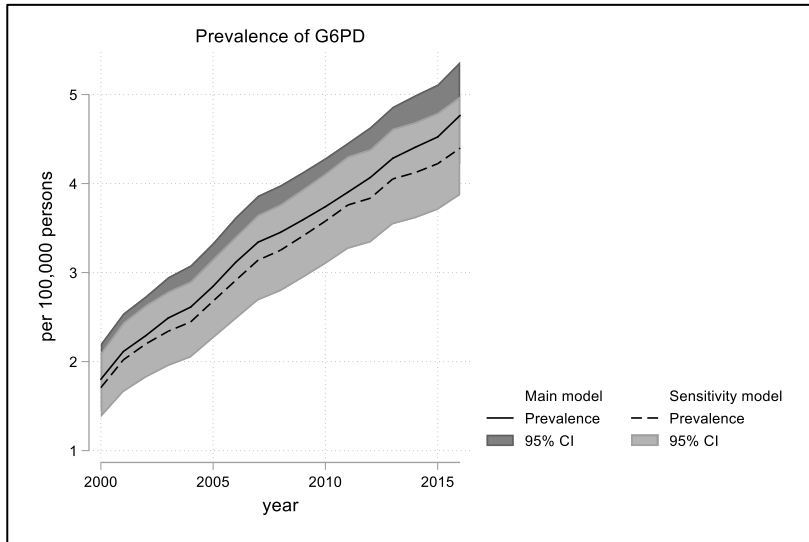

The overall prevalence with 95% confidence intervals for G6PD calculated on 1st of January each year with census data as denominator. The 95% confidence intervals are calculated using the Clopper-Pearson method. Abbreviation: CI: confidence interval, G6PD: Glucose-6-phosphate-deficiency.

**Supplementary Figure 5- Prevalence of Hemoglobin E trait disorders in Denmark, 2000-2016, according to models for classification of diagnosis (main model vs. sensitivity model)**

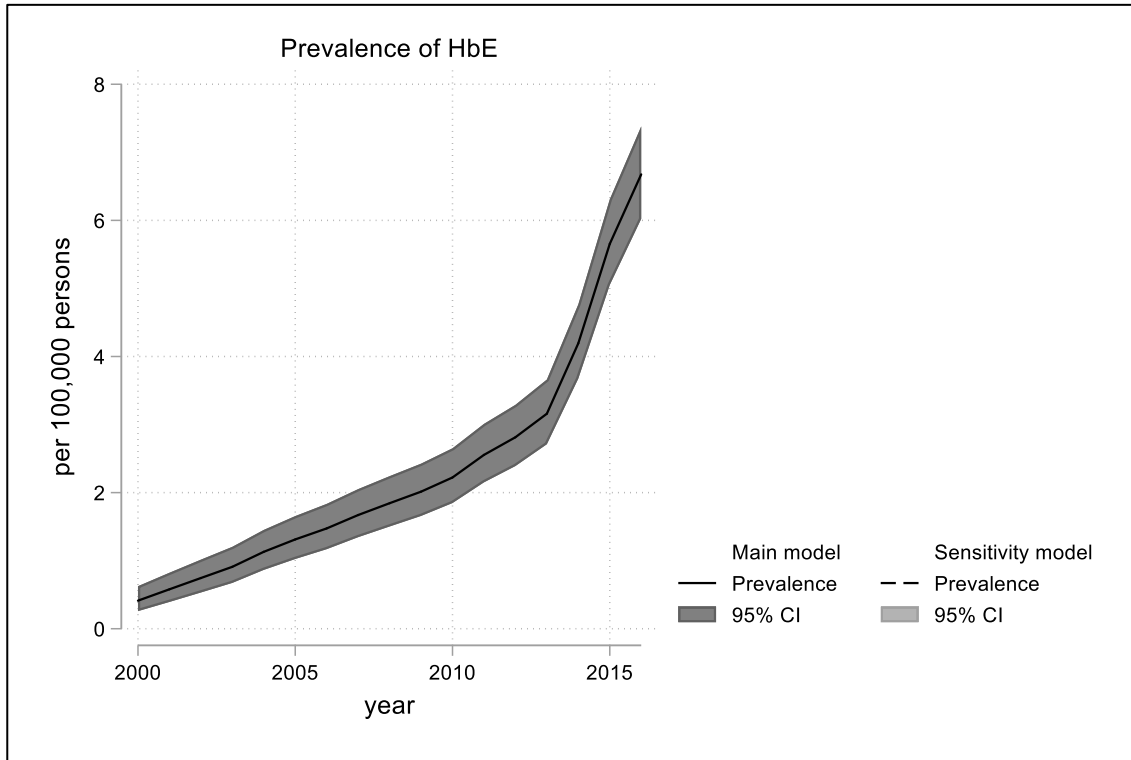

The overall prevalence with 95% confidence intervals for heterozygotic hemoglobin E trait calculated on 1st of January each year with census data as denominator. The 95% confidence intervals are calculated using the Clopper-Pearson method. Abbreviation: CI: confidence interval, HbE: heterozygotic hemoglobin E.

**Supplementary Figure 6- Prevalence of hemoglobin E disease in Denmark, 2000-2016, according to models for classification of diagnosis (main model vs. sensitivity model)**

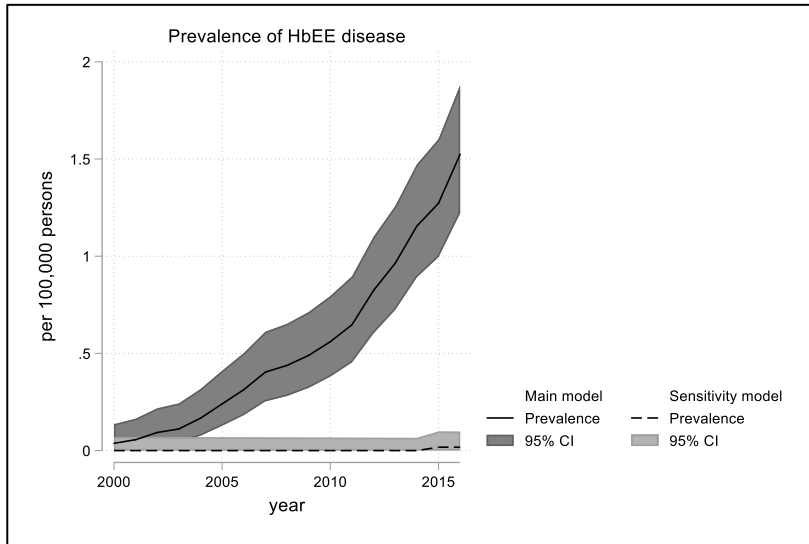

The overall prevalence with 95% confidence intervals for homozygotic hemoglobin E disease calculated on 1st of January each year with census data as denominator. The 95% confidence intervals are calculated using the Clopper-Pearson method. Abbreviation: CI: confidence interval, HbEE: homozygotic hemoglobin E.

**Supplementary Figure 7- Prevalence of Pyruvate kinase-deficiency in Denmark, 2000-2016, according to models for classification of diagnosis (main model vs. sensitivity model)**

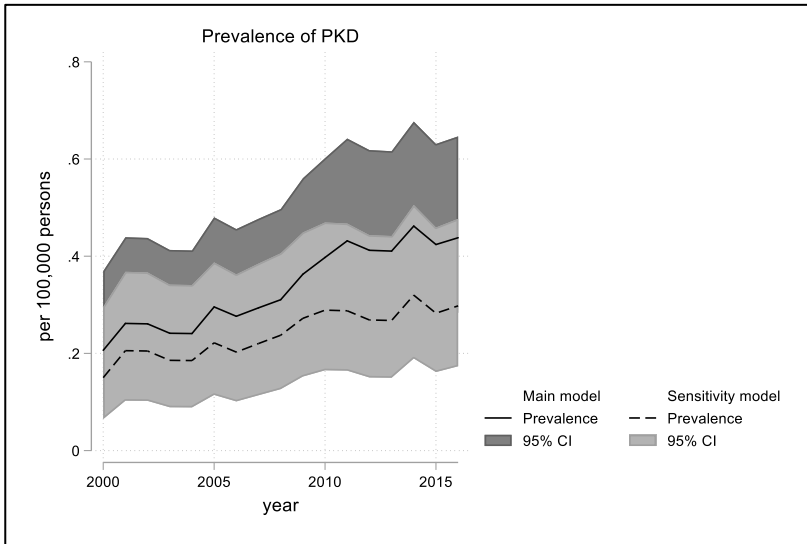

The overall prevalence with 95% confidence intervals for PKD trait calculated on 1st of January each year with census data as denominator. The 95% confidence intervals are calculated using the Clopper-Pearson method. Abbreviation: CI: confidence interval, PKD: pyruvate kinase deficiency.

**Supplementary Figure 8 - Prevalence of residual hemolytic disorders in Denmark, 2000-2016, according to models for classification of diagnosis (main model vs. sensitivity model)**

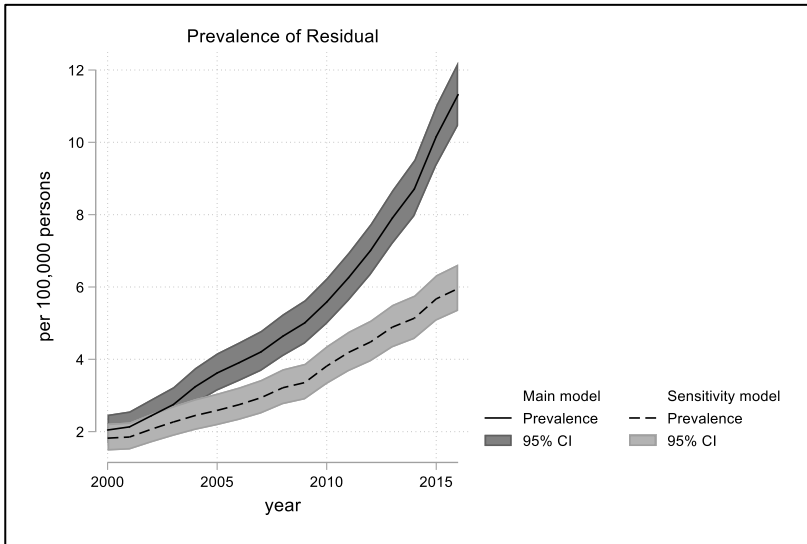

The overall prevalence with 95% confidence intervals for the combined group of residual hemolytic disorders calculated on 1st of January each year with census data as denominator. The 95% confidence intervals are calculated using the Clopper-Pearson method. Abbreviation: CI: confidence interval.
